# Supplementary material for: A Universal Pharmacokinetic Model for Dexmedetomidine in Children and Adults
Source: MDPI journal article supplement (doi:10.3390/jcm9113480), 2020-10-28
Supplement: s1 [file s1]

**Table S1.** Study characteristics from the pooled pediatric data used to develop the original dexmedetomidine Potts PK model. Data represent count or mean (range). Table adapted from Potts [20].

| Study | <i>n</i> | Age (y)          | Weight (kg)      | Procedure                                    | Route of Administration | Dose                              | Sampling schedule                       | Source |
|-------|----------|------------------|------------------|----------------------------------------------|-------------------------|-----------------------------------|-----------------------------------------|--------|
| 1     | 24       | 5.6 (2.0–12.0)   | 16.8 (10–42)     | Urologic, lower abdominal or plastic surgery | Slow bolus over 10 min  | 2, 4 or 6 $\mu\text{g}/\text{kg}$ | 10, 15, 30, 75 min, 2.5, 4, 6, 12, 24 h | [25]   |
| 2     | 16       | 2.75 (0.2–10.0)  | 14.58 (5.3–37.5) | Bronchoscopy or NMRI                         | Slow bolus over 5 min   | 1 $\mu\text{g}/\text{kg}$         | 5, 10, 20 min, 1, 2, 3, 4, 5 h          | [26]   |
| 3     | 45       | 3.38 (0.01–14.4) | 15.1 (3.1–58.9)  | Cardiac surgery                              | Slow bolus over 10 min  | 1–4 $\mu\text{g}/\text{kg}$       | 5–30 min, 1–2, 3–4, 6–10 h              | [17]   |

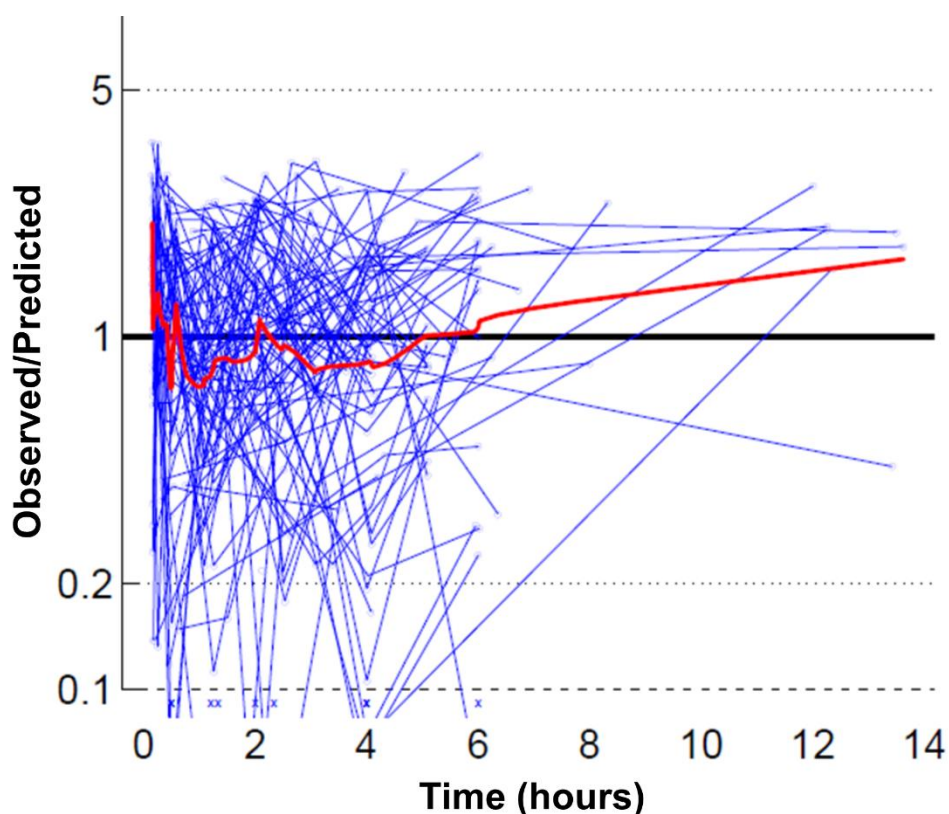

**Figure S1.** Profiles of the observed/predicted ratios of dexmedetomidine plasma concentrations determined using the model by Hannivoort et al.[8] Observed data were sourced from Potts 2009.[20] Each blue line represents a single participant. The broken grey lines demonstrate the acceptable range of dexmedetomidine observed/predicted ratios. The solid black line represents optimal predictive performance of the model (i.e. identical observed and predicted values). The red line demonstrates the median observed/predicted ratio and was determined with a loess smoothing function.

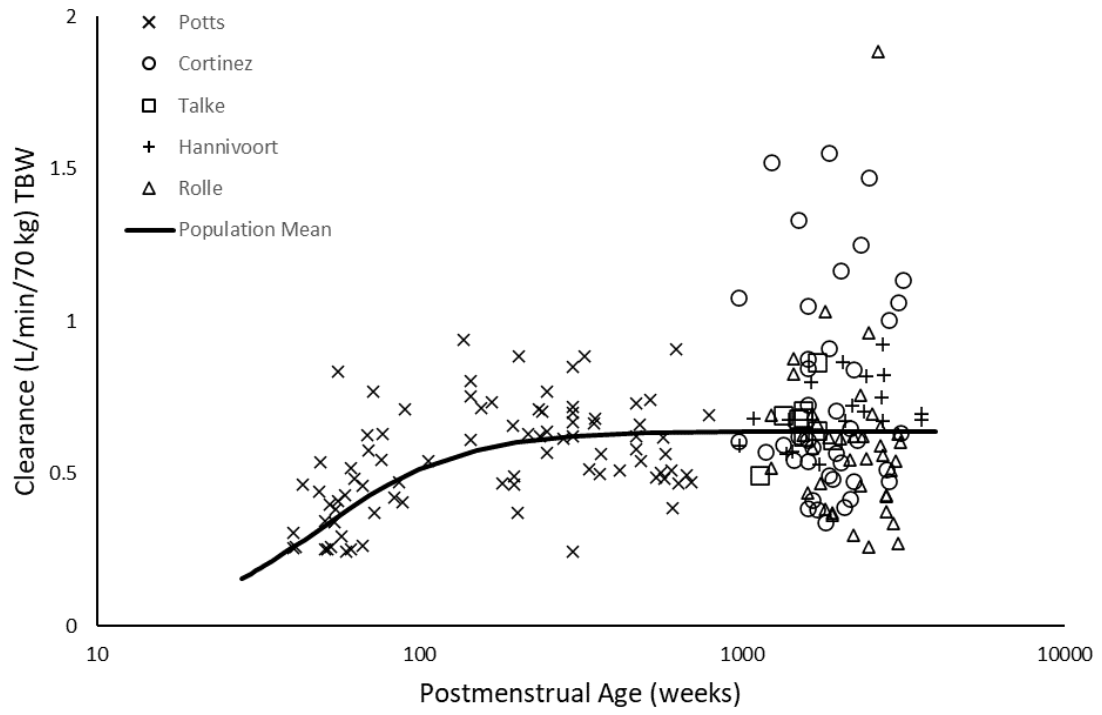

**Figure S2.** Maturation of dexmedetomidine clearance when scaled using total body weight.
